# Supplementary material for: SEMA3C Supports Pancreatic Cancer Progression by Regulating the Autophagy Process and Tumor Immune Microenvironment
Source: PubMed Central journal article supplement (PMC9243227; doi:10.3389/fonc.2022.890154), 2022-06-16
Supplement: DataSheet_1.pdf [file DataSheet_1.pdf]

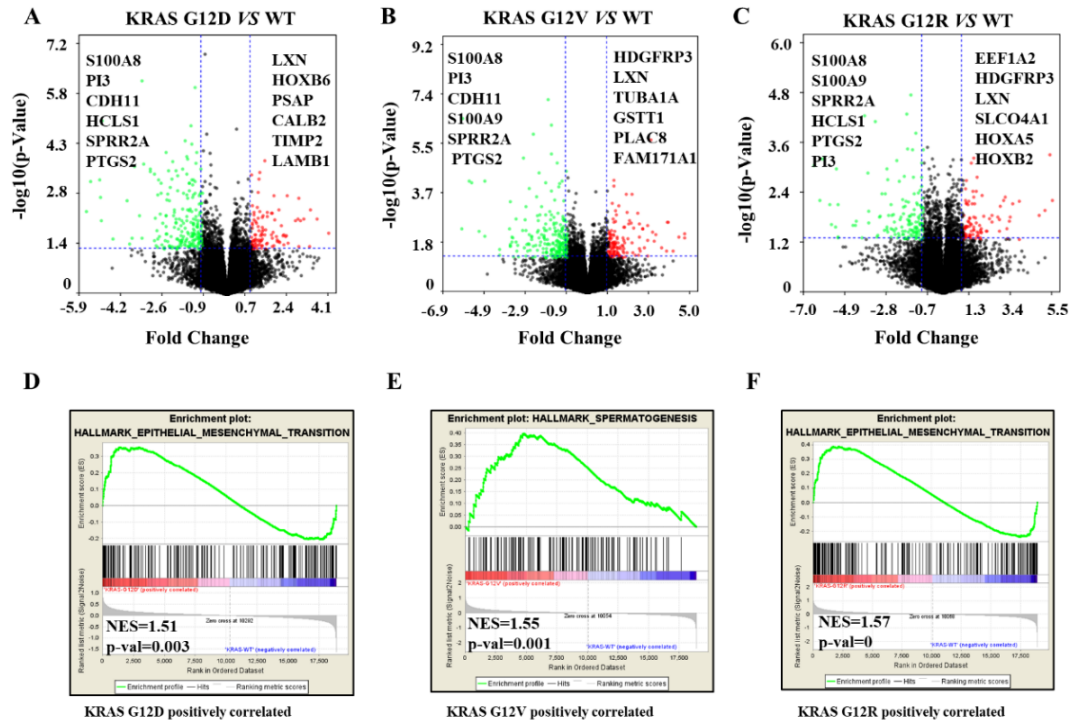

**Figure S1 (A-C)** Differential genes expression in different *KRAS* mutation subtype cell lines. **(D-F)** Major signaling pathway enrichment in different *KRAS* mutation subtype cell lines. The gene expression profiles were obtained from the Cell Line Encyclopedia.

| CELL LINES               | CHR | CDS mut | AA mut |
|--------------------------|-----|---------|--------|
| <i>SNU410_PANCREAS</i>   | 12  | c.35G>A | p.G12D |
| <i>ASPC1_PANCREAS</i>    | 12  | c.35G>A | p.G12D |
| <i>L33_PANCREAS</i>      | 12  | c.35G>A | p.G12D |
| <i>PANC1005_PANCREAS</i> | 12  | c.35G>A | p.G12D |
| <i>PL45_PANCREAS</i>     | 12  | c.35G>A | p.G12D |
| <i>BXPC3_PANCREAS</i>    | 12  | NO      | NO     |
| <i>TCCPAN2_PANCREAS</i>  | 12  | c.34G>C | p.G12R |
| <i>KCIMOH1_PANCREAS</i>  | 12  | c.35G>A | p.G12D |
| <i>HPAFII_PANCREAS</i>   | 12  | c.35G>A | p.G12D |
| <i>CAPAN2_PANCREAS</i>   | 12  | c.35G>T | p.G12V |
| <i>DANG_PANCREAS</i>     | 12  | c.35G>T | p.G12V |
| <i>PANC0327_PANCREAS</i> | 12  | c.35G>T | p.G12V |
| <i>CFPAC1_PANCREAS</i>   | 12  | c.35G>T | p.G12V |
| <i>KLM1_PANCREAS</i>     | 12  | c.35G>A | p.G12D |
| <i>PANC0203_PANCREAS</i> | 12  | c.35G>A | p.G12D |
| <i>CAPANI_PANCREAS</i>   | 12  | c.35G>T | p.G12V |
| <i>PATU8902_PANCREAS</i> | 12  | c.35G>T | p.G12V |
| <i>PK1_PANCREAS</i>      | 12  | c.35G>A | p.G12D |
| <i>PANC0504_PANCREAS</i> | 12  | c.35G>A | p.G12D |
| <i>PK59_PANCREAS</i>     | 12  | c.35G>A | p.G12D |
| <i>SU8686_PANCREAS</i>   | 12  | c.35G>A | p.G12D |

|                           |    |         |        |
|---------------------------|----|---------|--------|
| <i>SUIT2_PANCREAS</i>     | 12 | c.35G>A | p.G12D |
| <i>PANC0813_PANCREAS</i>  | 12 | c.35G>A | p.G12D |
| <i>KP2_PANCREAS</i>       | 12 | c.34G>C | p.G12R |
| <i>HPAC_PANCREAS</i>      | 12 | c.35G>A | p.G12D |
| <i>SNU324_PANCREAS</i>    | 12 | NO      | NO     |
| <i>SW1990_PANCREAS</i>    | 12 | c.35G>A | p.G12D |
| <i>HUPT3_PANCREAS</i>     | 12 | c.34G>C | p.G12R |
| <i>SNU213_PANCREAS</i>    | 12 | c.35G>T | p.G12V |
| <i>YAPC_PANCREAS</i>      | 12 | c.35G>T | p.G12V |
| <i>KP3_PANCREAS</i>       | 12 | c.35G>T | p.G12V |
| <i>PSN1_PANCREAS</i>      | 12 | c.34G>C | p.G12R |
| <i>PANC0403_PANCREAS</i>  | 12 | c.35G>A | p.G12D |
| <i>PK45H_PANCREAS</i>     | 12 | c.35G>A | p.G12D |
| <i>HUPT4_PANCREAS</i>     | 12 | c.35G>T | p.G12V |
| <i>QGP1_PANCREAS</i>      | 12 | c.35G>T | p.G12V |
| <i>PANCI_PANCREAS</i>     | 12 | c.35G>A | p.G12D |
| <i>MIAPACA2_PANCREAS</i>  | 12 | c.35G>T | p.G12C |
| <i>PATU8988S_PANCREAS</i> | 12 | c.35G>T | p.G12V |
| <i>KP4_PANCREAS</i>       | 12 | c.35G>A | p.G12D |
| <i>PATU8988T_PANCREAS</i> | 12 | c.35G>T | p.G12V |

**Table 1** Different *KRAS* mutation types in pancreatic cancer cells.

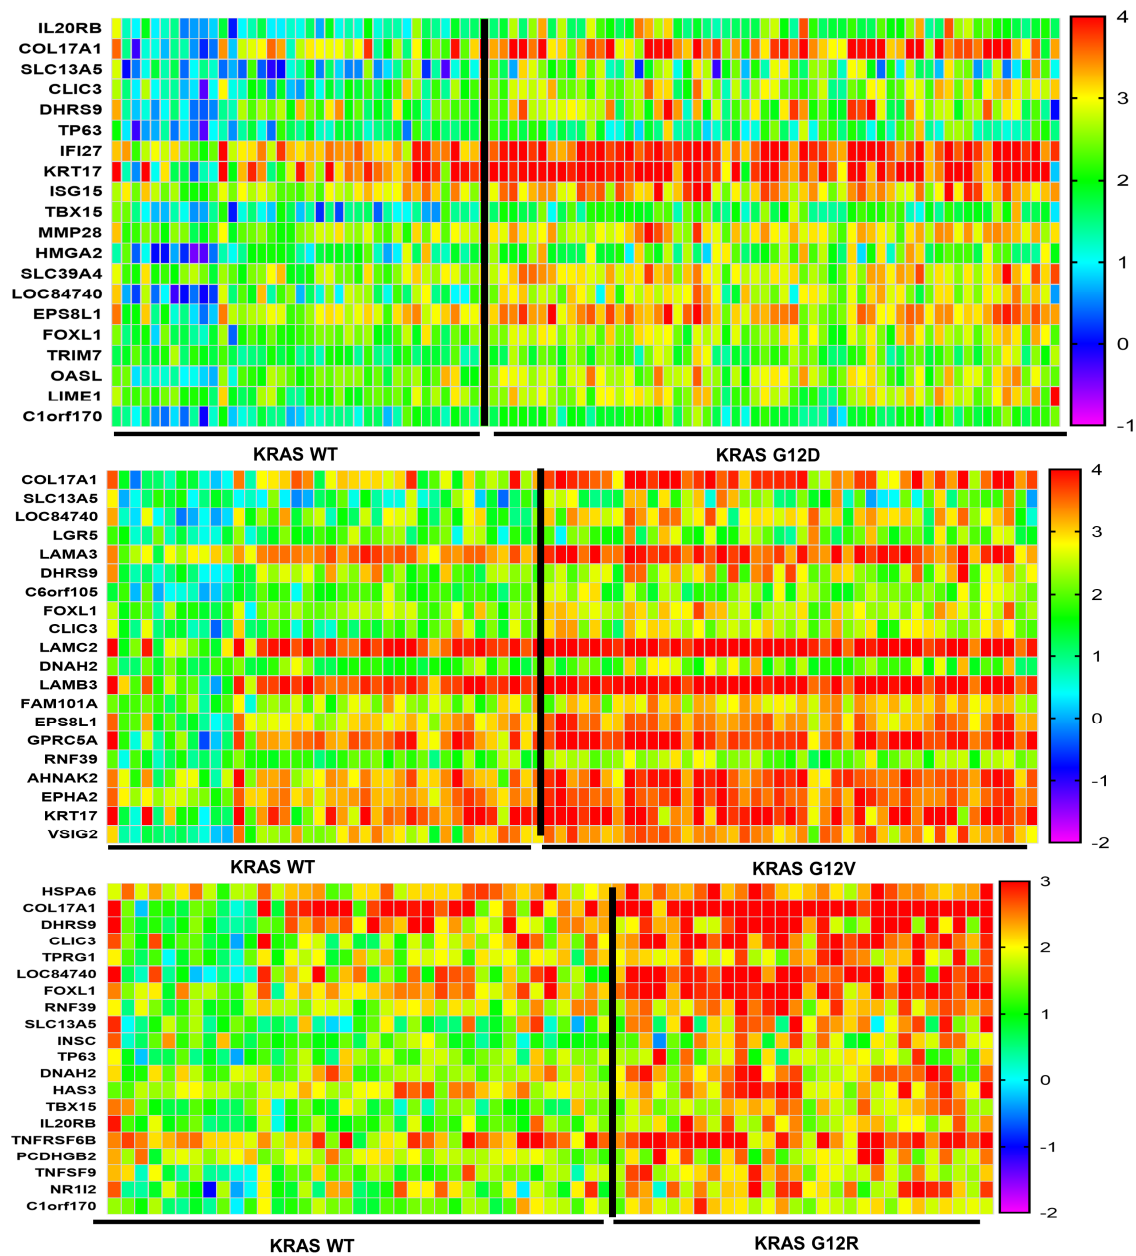

**Figure S2** Different expressed genes ( $FC \geq 1.5$ ,  $p \text{ Value} \leq 0.05$ ) between KRAS WT and KRAS mutations. Data was collected from TCGA.

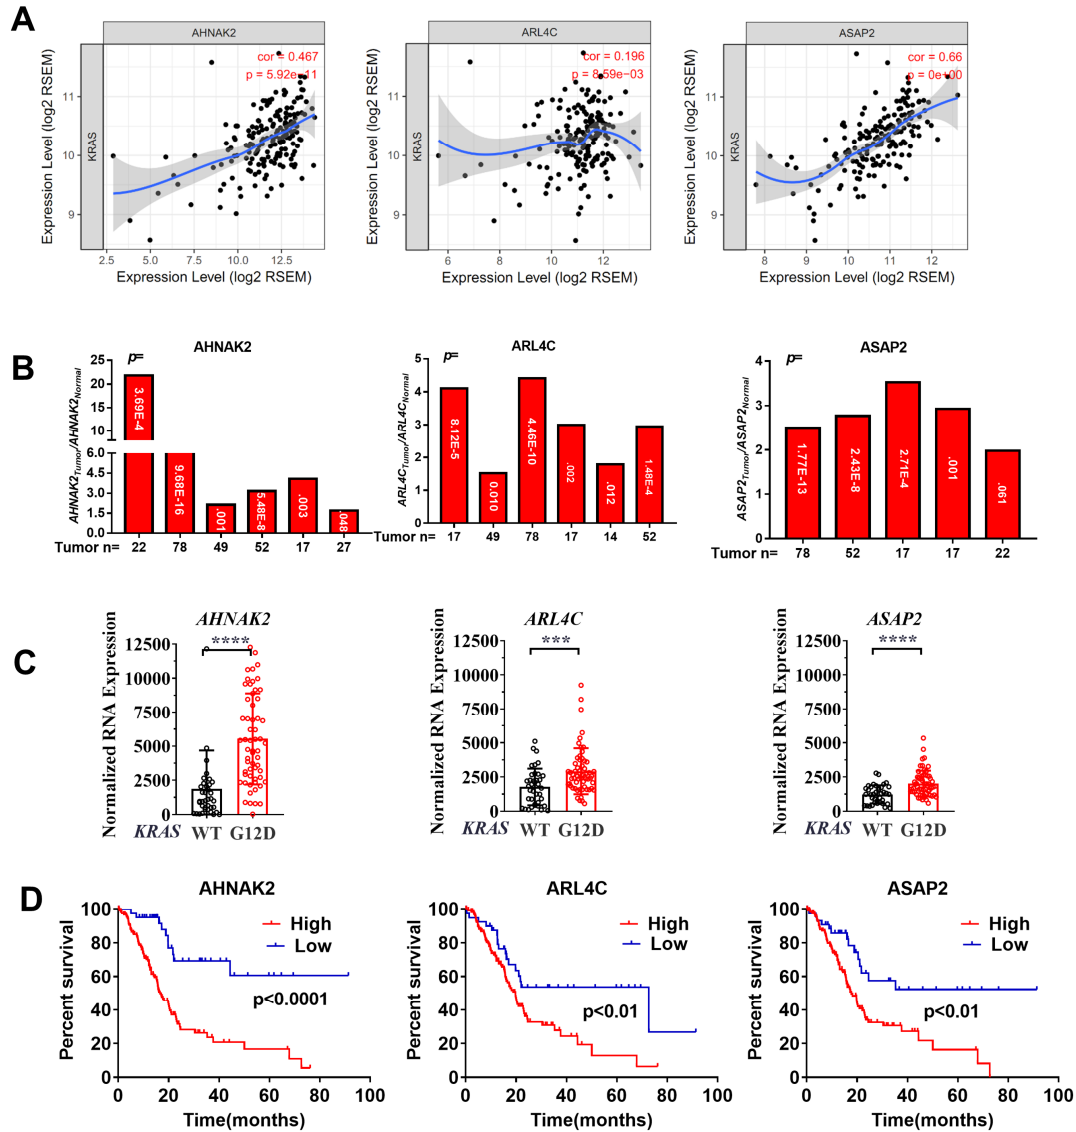

**Figure S3 (A-D)** Evaluation of the AHNAK2/ARL4C/ASAP2 in pancreatic cancer patients for correlation with KRAS expression(A), expression in Tumor/Normal (B), expression in G12D/WT(C) and clinical outcome(D). T-tests or log-rank Test for the measurements between the two groups \*P < 0.05, \*\*P < 0.01.

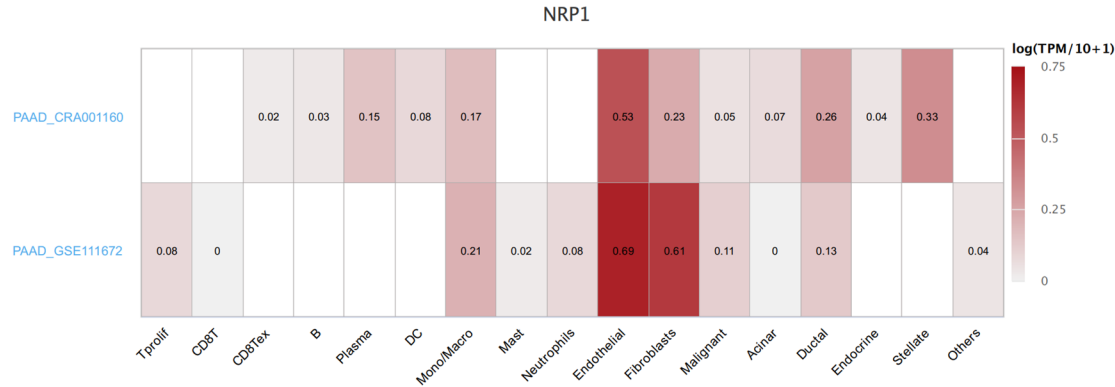

**Figure S4** NRP1 expression in different cell types in pancreatic cancer, data were collected from TISCH[51].

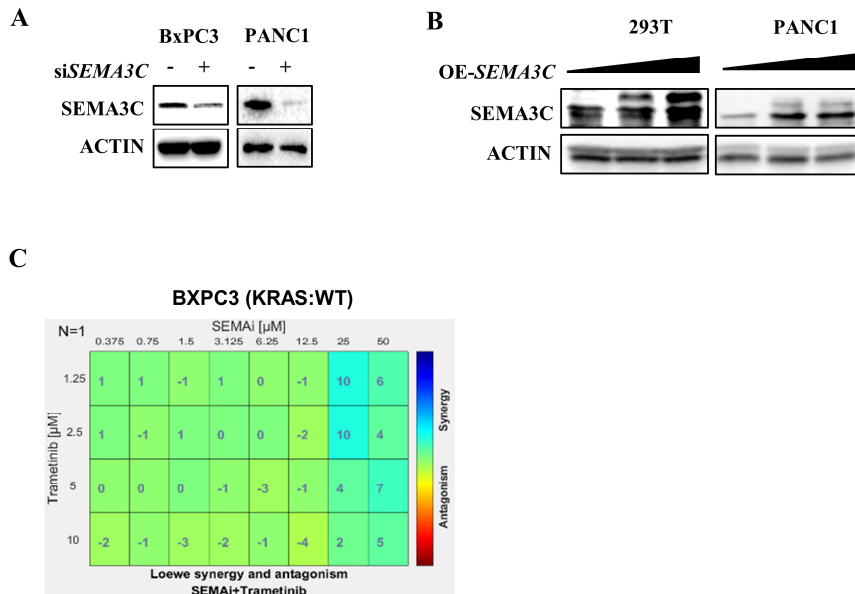

**Figure S5**

The protein level detected by WB for knocking down (A) or overexpression of SEMA3C(B).

(C) Synergistic effects on cell viability evaluated by combining trametinib and SEMA3C inhibitor in BXPC3 cells calculated with combenefit software.

**Primer's list** (Designed from Primer Bank: <https://pga.mgh.harvard.edu/primerbank/index.html>):

| Mouse:  | Primer                     |
|---------|----------------------------|
| ARG1-F  | 5-CTCCAAGCCAAAGTCCTTAGAG-3 |
| ARG1-R  | 5-AGGAGCTGTCATTAGGGACATC-3 |
| CD163-F | 5- TCCACACGTCCAGAACAGTC-3  |

|               |                              |
|---------------|------------------------------|
| CD163-R       | 5- CCTTGGAACAGAGACAGGC-3     |
| PD-L1-F       | 5-GCTCCAAAGGACTTGTACGTG-3    |
| PD-L1-R       | 5-TGATCTGAAGGGCAGCATTTC-3    |
| GAPDH-F       | 5-TGGATTTGGACGCATTGGTC-3     |
| GAPDH-R       | 5-TTTGCACTGGTACGTGTTGAT-3    |
| <b>Human:</b> | <b>Primer</b>                |
| ARG1-F:       | 5- GTGGAAACTTGCATGGACAAC-3   |
| ARG1-R        | 5- AATCCTGGCACATCGGGAATC-3   |
| PD-L1-F       | 5- TGGCATTGCTGAACGCATT-3     |
| PD-L1-R       | 5- TGCAGCCAGGTCTAATTGTTTT-3  |
| CD163-F       | 5- TTTGTCAACTTGAGTCCCTTCAC-3 |
| CD163-R       | 5- TCCCGCTACACTTGTTTTCAC-3   |
| SEMA3C-F      | 5- TTTGCGTGTTGGTTGGAGTAT-3   |
| SEMA3C-R      | 5- TCCTGTAGTCTAAAGGATGGTGG-3 |
| ATG3-F:       | 5- GACCCCGTCCTCAAGGAA-3      |
| ATG3-R        | 5- TGTAGCCCATGCCATGTTGG-3    |
| ARG5-F        | 5- AGAAGCTGTTTCGTCCTGTGG-3   |
| ARG5-R        | 5- AGGTGTTTCCAACATTGGCTC-3   |
| GAPDH-F       | 5- GGAGCGAGATCCCTCCAAAAT-3   |
| GAPDH-R       | 5- GGCTGTTGTCATACTTCTCATGG-3 |
